# Supplementary material
Source: bioRxiv or medRxiv preprint supplement (https://www.biorxiv.org/highwire/filestream/72700/field_highwire_adjunct_files/4/237255-3.pdf)
Supplement: Supplementary file [file 237255-3.pdf]

**Table S3. Merops classification of predicted *V. nonalfalae* secretome**

| MEROPS family/subfamily  | Enzyme type                                             | Number of hits |
|--------------------------|---------------------------------------------------------|----------------|
| ASPARTIC (A) PEPTIDASE   |                                                         | 15             |
| A1A                      | pepsin A (Homo sapiens)                                 | 15             |
| CYSTEINE (C) PEPTIDASES  |                                                         | 2              |
| C13                      | legumain (Canavalia ensiformis)                         | 1              |
| C56                      | PfpI peptidase (Pyrococcus furiosus)                    | 1              |
| IC FAMILY                |                                                         | 2              |
| I51                      | phosphatidylethanolamine-binding protein (Homo sapiens) | 2              |
| METALLO (M) PEPTIDASES   |                                                         | 34             |
| M12B                     | adamalysin (Crotalus adamanteus)                        | 1              |
| M14A                     | carboxypeptidase A1 (Homo sapiens)                      | 9              |
| M14B                     | carboxypeptidase E (Bos taurus)                         | 2              |
| M20A                     | glutamate carboxypeptidase (Pseudomonas sp.)            | 1              |
| M20D                     | carboxypeptidase Ss1 (Sulfolobus solfataricus)          | 1              |
| M28A                     | aminopeptidase S (Streptomyces griseus)                 | 6              |
| M28E                     | aminopeptidase Ap1 (Vibrio proteolyticus)               | 4              |
| M35                      | deuterolysin (Aspergillus flavus)                       | 4              |
| M36                      | fungalysin (Aspergillus fumigatus)                      | 1              |
| M43B                     | pappalysin-1 (Homo sapiens)                             | 5              |
| SERINE (S) PEPTIDASES    |                                                         | 55             |
| S10                      | carboxypeptidase Y (Saccharomyces cerevisiae)           | 6              |
| S12                      | D-Ala-D-Ala carboxypeptidase B (Streptomyces lividans)  | 2              |
| S1A                      | chymotrypsin A (Bos taurus)                             | 1              |
| S1B                      | glutamyl endopeptidase I (Staphylococcus aureus)        | 1              |
| S1E                      | streptogrisin A (Streptomyces griseus)                  | 1              |
| S28                      | lysosomal Pro-Xaa carboxypeptidase (Homo sapiens)       | 2              |
| S33                      | prolyl aminopeptidase (Neisseria gonorrhoeae)           | 5              |
| S53                      | sedolisin (Pseudomonas sp. 101)                         | 1              |
| S8A                      | subtilisin Carlsberg (Bacillus licheniformis)           | 15             |
| S8B                      | kexin (Saccharomyces cerevisiae)                        | 1              |
| S9B                      | dipeptidyl-peptidase IV (Homo sapiens)                  | 1              |
| S9C                      | acylaminoacyl-peptidase (Homo sapiens)                  | 3              |
| S9X                      | BC026374 protein (Mus musculus)                         | 16             |
| THREONINE (T) PEPTIDASES |                                                         | 2              |
| T2                       | glycosylasparaginase precursor (Homo sapiens)           | 1              |
| T3                       | gamma-glutamyltransferase 1 (Escherichia coli)          | 1              |
